# Supplementary material
Source: MDPI journal article supplement (https://www.mdpi.com/2227-9040/11/1/55)
Supplement: s1 [file s1]

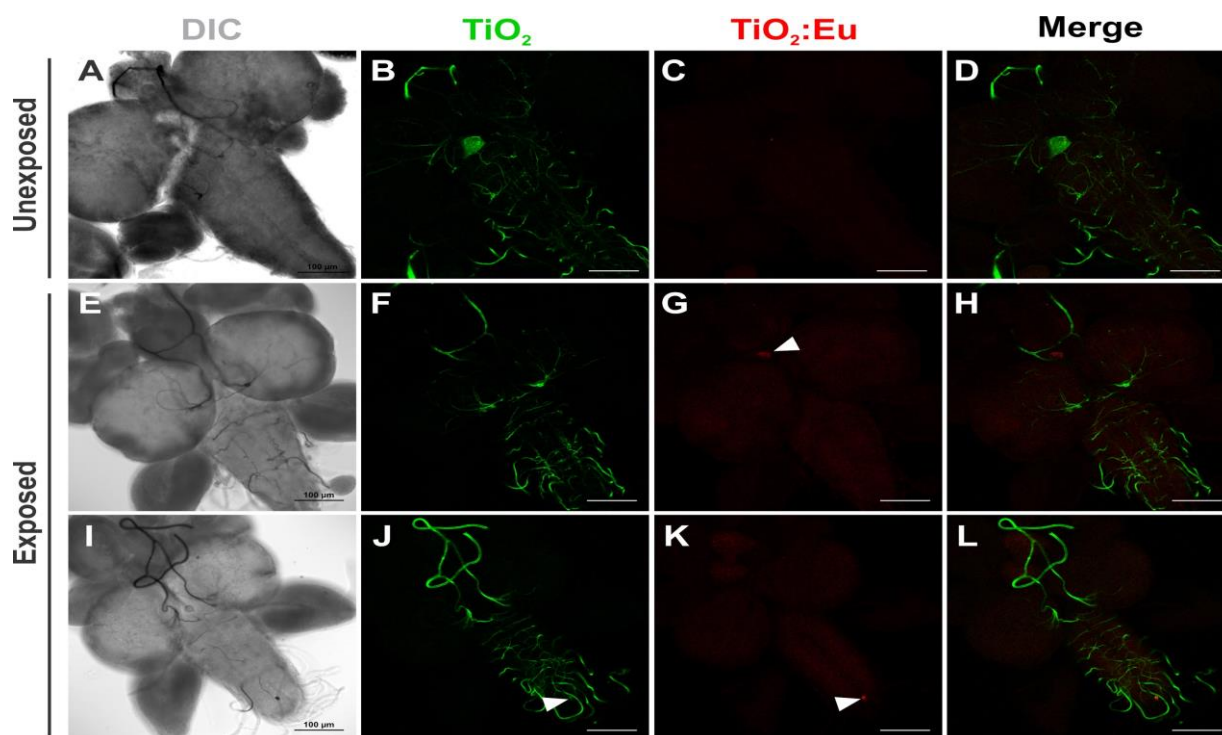

**Figure S1.** Confocal images of the distribution of  $\text{TiO}_2$  and  $\text{TiO}_2\text{:Eu}$  nanocrystals in the third instar larval brain. (A–D) Brain dissected from unexposed flies fed in standard food medium. Note the intense autofluorescence of the tracheal system under 405 laser excitation. (E–L) Brain dissected from third instar larvae exposed to 4 mg/mL of  $\text{TiO}_2$  and  $\text{TiO}_2\text{:Eu}$  showed aggregates of these nanocrystals closed to the optic lobe (arrowhead in G). DIC: differential interference contrast; Green:  $\text{TiO}_2$  nanocrystals fluorescence under 405 laser excitation; Red:  $\text{TiO}_2\text{:Eu}$  nanocrystals fluorescence under 552 laser excitation.
